# Supplementary material for: Identification and characterization of rabbit ROSA26 for gene knock-in and stable reporter gene expression
Source: PubMed Central journal article supplement (PMC4846827; doi:10.1038/srep25161), 2016-04-27
Supplement: srep25161-s1.pdf [file srep25161-s1.pdf]

1 **Supplementary data**

2

3 **Title:**

4 **Identification and characterization of rabbit ROSA26 for gene**  
5 **knock-in and stable reporter gene expression**

6 **Authors:**

7 Dongshan Yang<sup>1</sup>, Jun Song<sup>1</sup>, Jifeng Zhang<sup>1</sup>, Jie Xu<sup>1</sup>, Tianqing Zhu<sup>1</sup>, Zhong Wang<sup>2</sup>, Liangxue  
8 Lai<sup>3</sup>, Y.Eugene Chen<sup>1,2\*</sup>

9 **Affiliations:**

10 1. Center for Advanced Models for Translational Sciences and Therapeutics, University of Michigan Medical  
11 Center, Ann Arbor, MI 48109,USA

12 2. Department of Cardiac Surgery, Cardiovascular Research Center, University of Michigan, Ann Arbor, MI  
13 48109, USA

14 3. Guangzhou Institutes of Biomedicine and Health, Chinese Academy of Sciences, Guangzhou, 510530,  
15 China

16 \*Correspondence should be addressed to [echenum@med.umich.edu](mailto:echenum@med.umich.edu)

17

18

19

20

21

22 **Supp. Table 1.** Primers used in the present study.

|                                    | <b>SIZE</b>                  | <b>sequences</b>                                                                                                                         |
|------------------------------------|------------------------------|------------------------------------------------------------------------------------------------------------------------------------------|
| For indel detection                | F1/R1, 2kb                   | F1: 5'- agccctaaattcaagccctgtg-3'<br>R1: 5'- agaagcctgtcccctaaacta-3'<br>Pseq: 5'- ggggagtgaaaccagcagacg-3'                              |
| For Rosa-EGFP ki detection         | F2/R2, 0.8 kb                | F2: 5'- ctccccagcaggcagaagt-3'<br>R2: 5'- aaggtgagaaacaggcagaaatagt-3'                                                                   |
| For Rosa-Cre reporter ki detection | F3/R3, 1.5 kb                | F3: 5'-agaagcctgtcccctaaacta-3'<br>R3: 5'-cggcggcggtcacgaactcc-3'                                                                        |
| 5'-GSP                             |                              | 5'- <b>gattacgccaagctt</b> caggttcagggggaggtgtgggaggtt-3'                                                                                |
| 3'-GSPs                            |                              | 5'- <b>gattacgccaagctt</b> ggctgtgctctggggctccggtcctca-3'<br>5'- <b>gattacgccaagctt</b> attcttcgggccatcctgtattgtgtag-3'                  |
| For Realtime-PCR                   | F4/R4, 66 bp<br>F5/R5, 79 bp | F4: 5'- agaagaggctgtgctctgg -3'<br>R4: 5'- cagcaagtgtcgtccact -3'<br>F5: 5'- aggctggcctcaactttgta -3'<br>R5: 5'- acagccagtcaagtgtcgtc-3' |

23  
24  
25  
26  
27  
28  
29  
30  
31  
32  
33  
34  
35  
36  
37

38 **Supp. Table 2.** Weight comparison of rbRosa26-GFP and rbRosa26-Cre-reporter knock-in rabbits (F1  
39 generation) with their age matched controls.  
40

|            | <b>Weight (kg) ± SD (n)</b> |                                 |                 |
|------------|-----------------------------|---------------------------------|-----------------|
| <b>Age</b> | <b>rbRosa26-GFP ki</b>      | <b>rbRosa26-Cre reporter ki</b> | <b>WT</b>       |
| 5 months   | 3.27 ± 0.26 (9)             |                                 | 3.29 ± 0.07 (4) |
| 4 months   |                             | 2.70 ± 0.04 (5)                 | 2.79 ± 0.10 (4) |

41  
42

43 **Supp. Fig. 1. Off target analysis of in founder rabbits.** (A) Only one off target match is identified to be  
 44 within an exon region of a gene. It is in the 3' UTR of Has2 gene. Red characters are the seed + PAM  
 45 sequence in the sgRNA. (B) T7 endonuclease I assay revealed gene editing events in the on target region  
 46 but none at the off target region in all founder animals examined. wt: wild type. M: NEB 100 bp DNA  
 47 Ladder marker. On target: samples are from the on target region (i.e. rbRosa26). Off target: samples are  
 48 from the off target regions (3' UTR of Has2) from founder #1 to #4. #1 and #2: breeding founders of  
 49 rbRosa26-GFP knock-in rabbits. #3 and #4: breeding founders of rbRosa26-Cre-reporter knock-in rabbits.  
 50  
 51  
 52  
 53

A. Off target match identified on the 3' UTR of Has2

Gene HAS2

```

137491005 AATTTTATCAAAAATATTTTATTTTACAAAAAATCAATTATACTATACATCCTATACTGG
137491065 AAGTACATTGAATAATTGCTAAAATAAATACAGGCAATTAATTCACCTTTTTATAAGAAT
137491125 GAGAGAATTTGACATTTGAATGTTATCAAAGCTTAACTTAGAACATAAATAGTTAAAAAG
137491185 TCAAAGTCAAGTTTTAGTCTCATTATTTGGCATGGTATGTTTGTTCACCAAGCTCTCT
137491245 GATCCGTGAGAGTCTGAGTTTAAGAATCTTATGTACCTTTTGTAACTCTGAAGGTAGAATG
137491305 TGCAGCTTTTCTTAGGCAGGATAGATATAACATAGATGTCTACATGGAAAGGAAGCAGA
137491365 AGGGCAGGAAGCCACATTTTAACATTTCTCTACACGTCTCTGCTTCAGAACAAGGCTTT
137491425 GAAATTATTCATGCATTCGTGATGATGCTTTGTAACACAGGTCTACACAGCACCAGCTATA
137491485 AGGCAAGATTGAATGTTTACAAAAGTCAAATTGGATAATTGAGGTCCCATAGTAAGTAAAG
137491545 TTCAGAGCACCTGGTTCATCCAGTTTTCTATGTGCCAATTCCTTGACATACTACTTAACC
137491605 TTGATATCATTTCCTACT
  
```

B. T7 endonuclease I assay

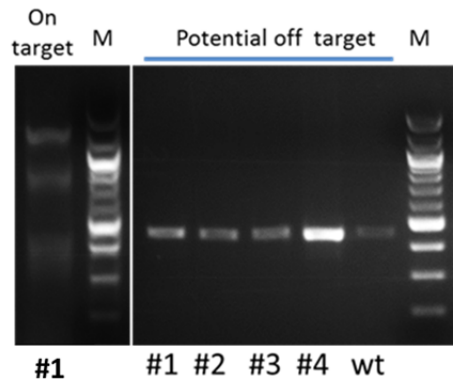

54  
 55

56 **Supp. Fig. 2. Donor DNA sequence and annotation**

57 rbRosa26-EGFP donor DNA sequence:

5'-

*acaatgccatgcttcaactgtgtgtgtgtttttttataagacttttaaagtctgatgggaagacacccaaggacagtattcttcagag*  
*cttcggtgttcagagagagctctcagacagttgcctttctatataatacaattctcaatcccacatccagagacgataaattcacagtgtgtgt*  
*ggcatccccaggggaagcgctagcattctgcatctttcaagtctgtgtctgtActgcagagtagctgcagtgaggtgctaggcctgtttcct*  
*gacagaaatggttacaactcatagaaactatgctttttggcctcagttttcaccaactgaaatattttcattttccaaaaacaggcagtggg*  
*aaaacattgaaaagcaaggattttgtaattcttttgagactctttttaaaacttttaaaaatactttaaaaaatgctttaattgctttt*  
*tgaacaagaaaaattgtgtgatagatgaatctaagttacactccttaaggacatggtgatttaattctttgggtctaggcacagctgggagtt*  
*aataaatgttgcttttgaaattggtttgtaatagtcatttaaacccacaaaacatagaaggaaggttcagctcatggaggaactggagtc*  
*atacttaagtcgctgatattctattcatagatgaaactcgggcctcatggtctcgo* **GGCTAGCAGATCTGTAGGGCGCAGTAGTCCA**  
**Splicing Acceptor**  
**GGGTTTCCTTGATGATGTCATACTTATCCTGTCCCTTTTTTCCACAGCTCGCGGTTGAGGACAAACTCTTCGCGGT**  
**CTTCCAGTGGGGATCGACGGTATCGAT**AAGCTTGGTACCGCGGGCCCGGGATCCACCGGTCGCCACC**ATGGTGA**  
**GCAAGGGCGAGGAGCTGTTACCGGGGTGGTGCCATCCTGGTCGAGCTGGACGGCGACGTAAACGGCCACAAG**  
**TTCAGCGTGTCGCGCAGGGCGAGGGCGATGCCACCTACGGCAAGCTGACCCTGAAGTTCATCTGCACCACCGGC**  
**AAGCTGCCCGTGCCCTGGCCACCCTCGTACCACCTGACCTACGGCGTGCAGTGCTTCAGCCGCTACCCCGACC**  
**ACATGAAGCAGCACGACTTCTCAAGTCCGCCATGCCGAAGGCTACGTCCAGGAGCGCACCATCTTCTCAAGGA**  
**CGACGGCAACTACAAGACCCGCGCCGAGGTGAAGTTCGAGGGCGACACCCTGGTGAACCGCATCGAGCTGAAGG**  
**GCATCGACTTCAAGGAGGACGGCAACATCCTGGGGCACAAGCTGGAGTACAACAGCCACAACGTCTATA**  
**TCATGGCCGACAAGCAGAAGAACGGCATCAAGGTGAACTTCAAGATCCGCCACAACATCGAGGACGGCAGCGTG**  
**CAGCTCGCCGACCACTACCAGCAGAACACCCCATCGGCGACGGCCCGTGCTGCTGCCGACAACCACTACCTGA**  
**GCACCCAGTCCGCCCTGAGCAAAGACCCCAACGAGAAGCGCGATCACATGGTCCTGCTGGAGTTCGTGACCGCCG**  
**CCGGGATCACTCTCGGCATGGACGAGCTGTACAAGTAA**AGCGGCCGCGACTCTAGATCATAATCAGCCATACCAC

58

59

ATTTGTAGAGGTTTTACTTGCTTTAAAAAACCTCCCACACCTCCCCCTGAACCTGAAACATAAAATGAATGCAATTG  
 TTGTTGTTAACTTGTTTATTGCAGCTTATAATGGTTACAAATAAAGCAATAGCATCACAAATTCACAAATAAAGCA  
 TTTTTTCACTGCATTCTAGTTGTGGTTTGTCCAACTCATCAATGTATCTTAAGGCGTAAATTGTAAGCGTTAATAT  
 TTTGTTAAAATTCGCGTTAAATTTTTGTTAAATCAGCTCATTTTTTAACCAATAGGCCGAAATCGGCAAATCCCTTA  
 TAAATCAAAGAATAGACCGAGATAGGGTTGAGTGTGTTCCAGTTTGAACAAGAGTCCACTATTAAGAACGT  
 GGACTCCAACGTCAAAGGGCGAAAAACCGTCTATCAGGGCGATGGCCACTACGTGAACCATCACCTAATCAAG  
 TTTTTGGGGTCGAGGTGCCGTAAAGCACTAAATCGGAACCCTAAAGGGAGCCCCGATTAGAGCTTGACGGGG  
 AAAGCCGGCGAACGTGGCGAGAAAGGAAGGGAAGAAAGCGAAAGGAGCGGGCGCTAGGGCGCTGGCAAGTGT  
 AGCGGTCACGCTGCGCGTAACCACCACACCCGCCGCGCTTAATGCGCCGCTACAGGGCGCGTCAGGTGGCACTTT  
 TCGGGGAAATGTGCGCGGAACCCCTATTTGTTATTTTTCTAAATACATTCAAATATGTATCCGCTCATGAGACAAT  
 AACCTGATAAATGCTTCAATAATATTGAAAAAGGAAGAGTCCTGAGGCGAAAGAACCAGCTGTGGAATGTGTG  
 TCAGTTAGGGTGTGGAAAGTCCCCAGGCTCCCCAGCAGGCAGAAGTATGCAAAGCATGCGGTA*cctgttctaaccatc*  
*actgtaatcttctgtgcttgacttcttgagctttttgtcttaataaaccagctacctctgtttgtgaactcctgcatactgtttcttagaggacaga*  
*aattcattatattaacgtttgacttgaatgaacaagttaggatgctttaaaaaatctatacatttgaaaagtcagagttacaccaagagcgt*  
*aggagaggcagagagagagaggctcccgtctgctggttactccccagttggccgcaagggctggagctgcaccagtcagaagccagaagc*  
*ttttccaggtctctgatgtgggtgatgggcacaaggacttgactgtcttctactgcttcttaggcataggagagctggattggaagtggag*  
*gaaccgggactcgaactggtgtacatagggatgtcagtattgcaggcagcagctttaccactaaccacagtgctggccctgactcttgttaag*  
*ttaccaatccaggagtgtggtacttgactgtgcaggttgag-3'*  
*Homologous Arm*

61

62

63

rbRosa26-cre-reporter donor DNA sequence:

5'-

64

*acaatgcccatgccttcaactgtgtgtgtgttttttttataagacttttaaaagtctgatgggaagacacccaaggacagattcttcagag*  
*Homologous Arm*

cttcggtgttcagagagagctctcagacagttgcctttctgtgtagtgaggttctcagtcccacatccagagacgataaattcacagtgtgtgtg  
ggcatccccaggggcaagcgctagcattctgcatctttcaagtgtgtctgtActgcagagtagctgcagtgggtgctaggcctgttttct  
gacagaaatggttacaacttcatagaaactatgctttttggccctcagttttcaccaactgaaatattttcattttccaaaaacaggcagtggg  
aaaacattgaaaagcaaggattttgttaattctttttgagactctcttttaaaaacttttaaaaaatactttaaaaaatgcttttaattgctttt  
tgaacaagaaaaattgtgtgatagatgaatctaagttacactccttaaggacatggtgatttaattctttgggtctaggcacagctgggagtt  
aataaatgttgctttgtgaaattggtttgtgaatagtcatttaaacccacaaaacatagaaggaaggttcagctcatggaggaacttgagtc  
atacttaagtcgctgatattctattcatagatgaaactcgggctcatggtctcgaGGCTAGCAGATCTAATTGGCGGAAGGCCGTC  
AAGGCCTAGGCGCGCCTCAGTACTGCCTGCAGG**GTGACCTGCACGTCTAGGGCGCAGTAGTCCAGGGTTTCCTTG**  
**Splicing Acceptor**  
**ATGATGTCATACTTATCCTGTCCCTTTTTTCCACAGCTCGCGGTTGAGGACAAACTCTTCGCGGCTTTCCAGTAA**  
GAATTCCTCGATCGAGGGACCTA**ATAACTTCGTATAGCATACATTATACGAAGTTAT**ATTAAAGGGTTCCGCAAGCT  
TTCGCCACC**ATGGTGAGCAAGGGCGAGGAGGTCATCAAAGAGTTCATGCGCTCAAGGTGCGCATGGAGGGCTC**  
**TdTomato cDNA**  
**CATGAACGGCCACGAGTTCGAGATCGAGGGCGAGGGCGAGGGCCGCCCTACGAGGGCACCCAGACCCGAAG**  
**CTGAAGGTGACCAAGGGCGGCCCTGCCCTTCGCCTGGGACATCCTGTCCCCCAGTTCATGTACGGCTCCAAGG**  
**CGTACGTGAAGCACCCCGCCGACATCCCCGATTACAAGAAGCTGTCCTTCCCCGAGGGCTTCAAGTGGGAGCGCG**  
**TGATGAACTTCGAGGACGGCGGTCTGGTGACCGTGACCCAGGACTCCTCCCTGCAGGACGGCACGCTGATCTACA**  
**AGGTGAAGATGCGCGGCACCAACTTCCCCCGACGGCCCCGTAATGCAGAAGAAGACCATGGGCTGGGAGGCC**  
**TCCACCGAGCGCTGTACCCCGCGACGGCGTGCTGAAGGGCGAGATCCACCAGGCCCTGAAGCTGAAGGACGG**  
**CGGCCACTACCTGGTGGAGTTCAGACCATCTACATGGCCAAGAAGCCCGTGCAACTGCCCGGCTACTACTAGT**  
**GGACACCAAGCTGGACATCACCTCCCACAACGAGGACTACACCATCGTGGAACAGTACGAGCGCTCCGAGGGCCG**  
**CCACCACCTGTTCTGGGGCATGGCACCGGCAGACCCGGCAGCGGCAGCTCCGGCACCGCCTCTCCGAGGACAA**  
**CAACATGGCCGTCATCAAAGAGTTCATGCGCTTCAAGGTGCGCATGGAGGGCTCCATGAACGGCCACGAGTTCGA**  
**GATCGAGGGCGAGGGCGAGGGCCGCCCTACGAGGGCACCCAGACCCGAAGCTGAAGGTGACCAAGGGCGGC**  
**CCCCTGCCCTTCGCCTGGGACATCCTGTCCCCCAGTTCATGTACGGCTCCAAGGCGTACGTGAAGCACCCCGCCG**  
**ACATCCCCGATTACAAGAAGCTGTCCTTCCCCGAGGGCTTCAAGTGGGAGCGCGTGATGAACTTCGAGGACGGCG**

GTCTGGTGACCGTGACCCAGGACTCCTCCCTGCAGGACGGCACGCTGATCTACAAGGTGAAGATGCGCGCACCA  
 ACTTCCCCCGACGGCCCCGTAATGCAGAAGAAGACCATGGGCTGGGAGGCCTCCACCGAGCGCCTGTACCCC  
 GCGACGGCGTGCTGAAGGGCGAGATCCACCAGGCCCTGAAGCTGAAGGACGGCGGCCACTACCTGGTGGAGTTC  
 AAGACCATCTACATGGCCAAGAAGCCCCTGCAACTGCCCGCTACTACTACGTGGACACCAAGCTGGACATCACCT  
 CCCACAACGAGGACTACACCATCGTGGAAACAGTACGAGCGCTCCGAGGGCCGCCACCACCTGTTCTGTACGGCA  
 TGGACGAGCTGTACAAGTAGCGGCGCGACTCTAGATCATAATCAGCCATACCACATTTGTAGAGGTTTTACTTG  
 CTTTAAAAAACCTCCCACACCTCCCCCTGAACCTGAAACATAAAATGAATGCAATTGTTGTTGTTAACTTGTTTATTG  
 CAGCTTATAATGGTTACAAATAAAGCAATAGCATCACAAATTCACAAATAAAGCATTITTTTTCACTGCATTCTAGTT  
 GTGGTTTGTCCAACTCATCAATGGATCCATAAATTCGTATAGGATACTTTATACGAAGTTATTTGGTACCAAACCA  
 CAACTAGAATGCAGTGAAAAAATGCTTTATTTGTGAAATTTGTGATGCTATTGCTTTATTTGTAACCATTATAAGC  
 TGCAATAACAAGTTAACAACAACAATTGCATTCATTTTATGTTTCAGGTTCCAGGGGGAGGTGTGGGAGGTTTTTT  
 AAAGCAAGTAAACCTCTACAAATGTGGTATGGCTGATTATGATCTAGAGTCGCGGCCGCTTACTTGTACAGCTC  
 GTCCATGCCGAGAGTGATCCCGCGCGCGGTACGAACCTCCAGCAGGACCATGTGATCGCGCTTCTCGTTGGGGTG  
 TTTGCTCAGGGCGGACTGGGTGCTCAGGTAGTGTTGTGCGGGCAGCAGCACGGGGCCGTCGCCGATGGGGGTGT  
 TCTGCTGGTAGTGGTCGGCGAGCTGCACGCTGCCGTCCTCGATGTTGTGGCGGATCTTGAAGTTCACCTTGATGCC  
 GTTCTTCTGCTTGTGCGCCATGATATAGACGTTGTGGCTGTTGTAGTTGTAAGTCCAGCTTGTGCCCCAGGATGTTGC  
 CGTCTCCTTGAAGTCGATGCCCTCAGCTCGATGCGGTTACCAGGGTGTGCGCCTCGAAGTTCACCTCGGCGCG  
 GGTCTGTAGTTGCCGTCGTCCTTGAAGAAGATGGTGCCTCCTGGACGTAGCCTTCGGGCATGGCGGACTTGAA  
 GAAGTCGTGCTGCTTCATGTGGTCGGGGTAGCGGCTGAAGCACTGCACGCCGTAGGTGAGGGTGGTCACGAGGG  
 TGGGCCAGGGCACGGGCAGCTTGCCGGTGGTGCAGATGAACTCAGGGTCAGCTTGCCGTAGGTGGCATCGCCC  
 TCGCCCTCGCCGGACACGCTGAACTGTGGCCGTTACGTGCGCGTCCAGCTCGACCAGGATGGGCACCACCCCG  
 GTGAACAGCTCCTCGCCCTGCTACCATGGTGGATCTATAAATTCGTATAATGTATGCTATACGAAGTTATCCTGC  
 ATCGACCTAGACTAGCTAGAAGTATATAAATTCGTATAAAGTATCCTATACGAAGTTATCCTGCAGGGGATTTAA  
 TTAAGTGGCCTCATGGGCCTCCGCTCACTGCCCGCTTCCAGTCGGGAAACCTGTCGTGCCAGCTGCATTAACATG

LoxP2272

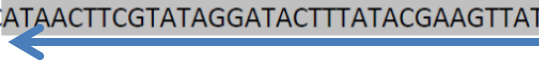

EGFP cDNA

LoxP

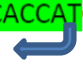

LoxP2272

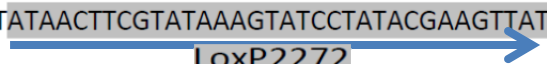



GTCATAGCTGTTTGCATGCCGGTA<sup>ctgttctaaccatcactgtaatcttctgtgcttgactccttgagctttttgtttaataaaccagc</sup>  
*Homologous Arm*  
*tacctctgtttgtgaactcctgcatactgttcttagaggacagaaattcattatattaacgtttgacttgaatgaacaagttaggatgctttaa*  
*aaaatctatacatttgaaaagtcagagttacaccaagagcgtaggagaggcagagagagagaggtctcccgtctgctggttactccccagtt*  
*ggccgcaagggctggagctgcaccagtcaagaagcagaagcttttccaggtctctgatgtgggtgcatgggcacaaggacttgactgtcttc*  
*tactgctttcctaggccataggagagctggattggaagtggaggaaccgggactcgaactgttgatagggatgtcagtattgcaggcagc*  
*agcttaccactaaccacagtgctggcctgactctgttaagttaccaatccaggagtgggtacttgactgtgcaggttag-3'*

67

68 *Homologous Arm* EGFP cDNA TdTomato cDNA Splicing Acceptor LoxP LoxP2272

69 26 bp sequence ( 5'-ggagcatgcagcttttctgggtt-3') were deleted to destroy sgRNA target.

70

71
